# Supplementary material for: Geomagnetic field declination: from decadal to centennial scales
Source: Copernicus journal article supplement (doi:10.5194/se-2017-119), 2017-11-08
Supplement: Supplementary file 1 [file se-2017-119-supplement.pdf]

# Supplementary material

5

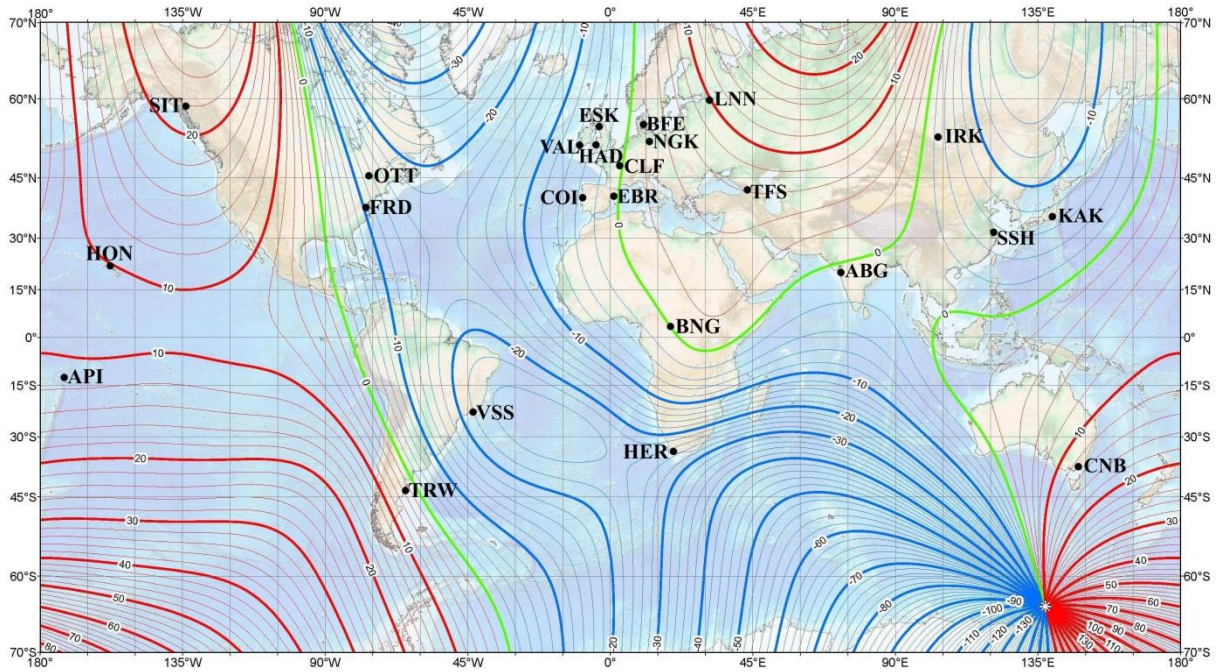

**Figure S1: Geographical distribution of magnetic observatories providing recordings more than 100 years. IAGA codes are used.**

**Background** – **2010.0** **declination** **map** **from**

10 [http://www.ngdc.noaa.gov/geomag/WMM/data/WMM2010/WMM2010\\_D\\_MERC.pdf](http://www.ngdc.noaa.gov/geomag/WMM/data/WMM2010/WMM2010_D_MERC.pdf).

15

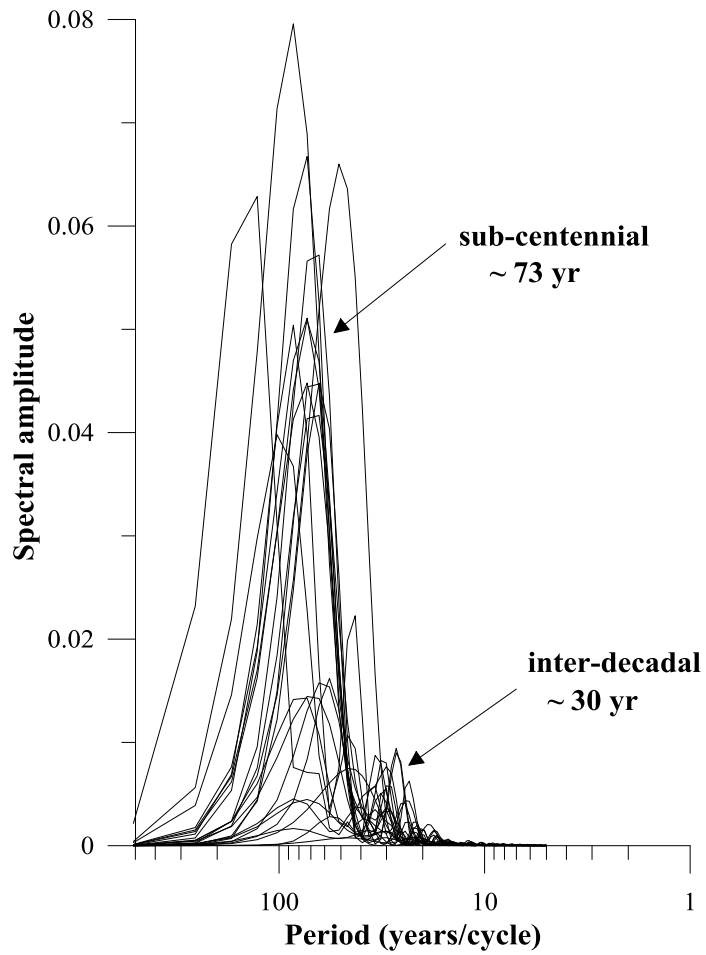

5 Figure S2: FFT power spectrum for the HP trend (i.e. the ~11-year variation removed) of declination first time derivative.

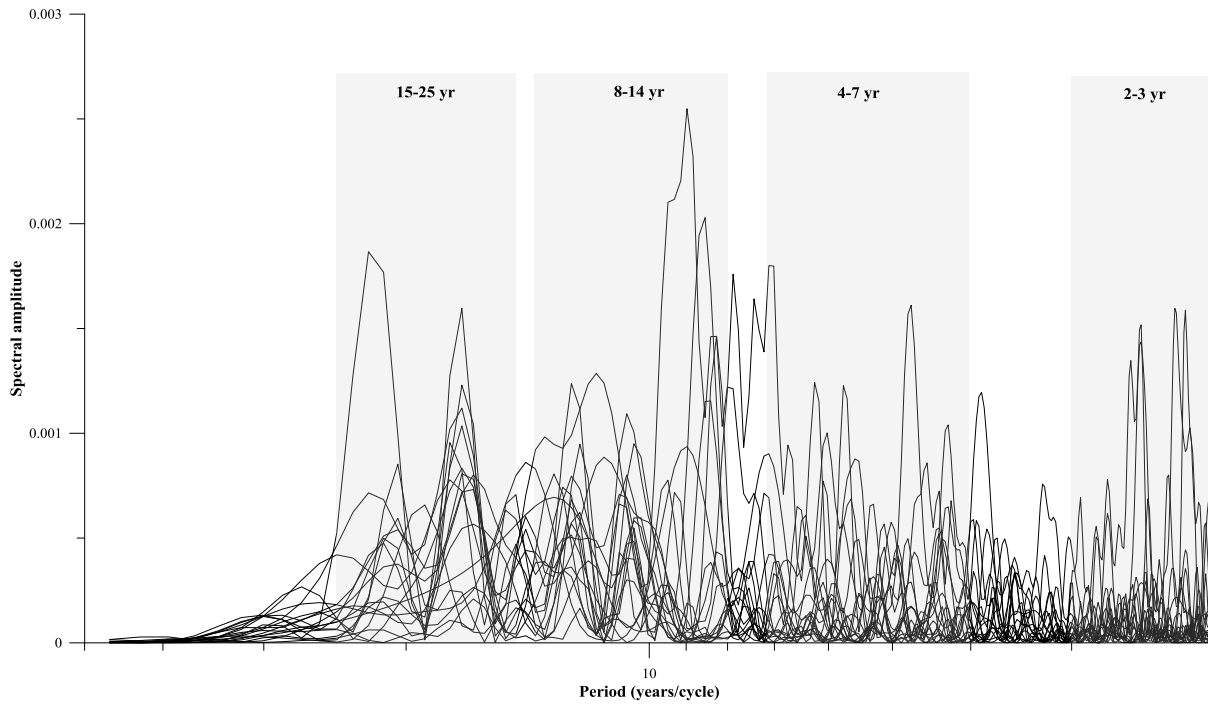

5 **Figure S3: FFT power spectrum for the cyclic constituent from HP filtering of the first time derivative of declination. Gray background: domains of 8-14 years, 15-25 years, 4-7 years and 2-3 years.**
